# Supplementary material
Source: PubMed Central journal article supplement (PMC4735870)
Supplement: NIHMS742662-supplement-Supplement.pdf [file NIHMS742662-supplement-Supplement.pdf]

Supplementary table: Weighted means and selected percentiles of OH-PAH (ng/g creatinine) among participants included in the final analysis. NHANES 2001-2006

| Chemicals                    | Mean  | 10 <sup>th</sup><br>percentile | 25 <sup>th</sup><br>percentile | Median | 75 <sup>th</sup><br>percentile | 90 <sup>th</sup><br>percentile |
|------------------------------|-------|--------------------------------|--------------------------------|--------|--------------------------------|--------------------------------|
| 1- Hydroxynaphthalene        | 8255  | 489                            | 833                            | 1999   | 6998                           | 17793                          |
| 2-Hydroxynaphthalene         | 6289  | 805                            | 1363                           | 2901   | 8091                           | 16041                          |
| 2-Hydroxyfluorene            | 654   | 103                            | 145                            | 247    | 751                            | 1760                           |
| 3-Hydroxyfluorene            | 335   | 34                             | 52                             | 97     | 398                            | 1010                           |
| 1-Hydroxyphenanthrene        | 213   | 61                             | 90                             | 141    | 235                            | 372                            |
| 2-Hydroxyphenanthrene        | 97    | 23                             | 36                             | 59     | 103                            | 180                            |
| 3-Hydroxyphenanthrene        | 191   | 38                             | 55                             | 91     | 176                            | 334                            |
| 1-Hydroxypyrene              | 134   | 23                             | 36                             | 67     | 138                            | 273                            |
| Summed LMW PAH<br>biomarkers | 16072 | 2154                           | 3212                           | 6210   | 18544                          | 38139                          |
